# Supplementary material for: Evaluation of a new Argovit as an antiviral agent included in feed to protect the shrimp Litopenaeus vannamei against White Spot Syndrome Virus infection
Source: PeerJ. 2020 Feb 27;8:e8446. doi: 10.7717/peerj.8446 (PMC7049459; doi:10.7717/peerj.8446)
Supplement: Supplemental Information 3 — These data represent bioassay determined the effect protector of Argovit-4 in feed against a specific inoculum of WSSV. [file peerj-08-8446-s003.xlsx]

## Sheet: Challenge
1. DEAD SHRIMP PER TREATMENT									2. % MORTALITY					3. CUMULATIVE MORTALITY (%)							4. MORTALITY (ANOVA) by treatment
									n=10 shrimp per replica												Normalized data by ArcSen
10 µg/g	H Post-Infection	replica 1	replica 2	replica 3	Sum	Mort. (%)	Cum. mort. (%)		H Post-Infection	replica 1	replica 2	replica 3		H Post-Infection	replica 1	replica 2	replica 3	Average	standard deviation		Treatment	% Mort	ArcSen
	0	0	0	0	0	0	0		0	0	0	0		0	0	0	0	0	0		C+	40	0.684719
	12	0	0	0	0	0	0		12	0	0	0		12	0	0	0	0	0		C+	50	0.785398
	24	0	0	0	0	0	0		24	0	0	0		24	0	0	0	0	0		C+	40	0.684719
	36	0	0	0	0	0	0		36	0	0	0		36	0	0	0	0	0		10 µg/g	20	0.463648
	48	1	0	0	1	3.33333	3.33333		48	10	0	0		48	10	0	0	3.33333	5.7735		10 µg/g	20	0.463648
	60	0	1	0	1	3.33333	6.66667		60	0	10	0		60	10	10	0	6.66667	5.7735		10 µg/g	10	0.321751
	72	1	0	1	2	6.66667	13.3333		72	10	0	10		72	20	10	10	13.3333	5.7735		100 µg/g	10	0.321751
	84	0	1	0	1	3.33333	16.6667		84	0	10	0		84	20	20	10	16.6667	5.7735		100 µg/g	10	0.321751
	96	0	0	0	0	0	16.6667		96	0	0	0		96	20	20	10	16.6667	5.7735		100 µg/g	10	0.321751
	108	0	0	0	0	0	16.6667		108	0	0	0		108	20	20	10	16.6667	5.7735		1000 µg/g	0	0
	120	0	0	0	0	0	16.6667		120	0	0	0		120	20	20	10	16.6667	5.7735		1000 µg/g	0	0
	132	0	0	0	0	0	16.6667		132	0	0	0		132	20	20	10	16.6667	5.7735		1000 µg/g	10	0.321751
	144	0	0	0	0	0	16.6667		144	0	0	0		144	20	20	10	16.6667	5.7735		C-	0	0
	156	0	0	0	0	0	16.6667		156	0	0	0		156	20	20	10	16.6667	5.7735		C-	0	0
	168	0	0	0	0	0	16.6667		168	0	0	0		168	20	20	10	16.6667	5.7735		C-	0	0
	180	0	0	0	0	0	16.6667		180	0	0	0		180	20	20	10	16.6667	5.7735
	192	0	0	0	0	0	16.6667		192	0	0	0		192	20	20	10	16.6667	5.7735
		2	2	1	5	16.6667				20	20	10
100 µg/g	H Post-Infection	replica 1	replica 2	replica 3	Sum	Mort. (%)	Cum. mort. (%)		H Post-Infection	replica 1	replica 2	replica 3		H Post-Infection	replica 1	replica 2	replica 3	Average	standard deviation
	0	0	0	0	0	0	0		0	0	0	0		0	0	0	0	0	0
	12	0	0	0	0	0	0		12	0	0	0		12	0	0	0	0	0
	24	0	0	0	0	0	0		24	0	0	0		24	0	0	0	0	0
	36	0	0	0	0	0	0		36	0	0	0		36	0	0	0	0	0
	48	0	1	0	1	3.33333	3.33333		48	0	10	0		48	0	10	0	3.33333	5.7735
	60	0	0	1	1	3.33333	6.66667		60	0	0	10		60	0	10	10	6.66667	5.7735
	72	0	0	0	0	0	6.66667		72	0	0	0		72	0	10	10	6.66667	5.7735
	84	1	0	0	1	3.33333	10		84	10	0	0		84	10	10	10	10	0
	96	0	0	0	0	0	10		96	0	0	0		96	10	10	10	10	0
	108	0	0	0	0	0	10		108	0	0	0		108	10	10	10	10	0
	120	0	0	0	0	0	10		120	0	0	0		120	10	10	10	10	0
	132	0	0	0	0	0	10		132	0	0	0		132	10	10	10	10	0
	144	0	0	0	0	0	10		144	0	0	0		144	10	10	10	10	0
	156	0	0	0	0	0	10		156	0	0	0		156	10	10	10	10	0
	168	0	0	0	0	0	10		168	0	0	0		168	10	10	10	10	0
	180	0	0	0	0	0	10		180	0	0	0		180	10	10	10	10	0
	192	0	0	0	0	0	10		192	0	0	0		192	10	10	10	10	0
		1	1	1	3	10				10	10	10
1000 µg/g	H Post-Infection	replica 1	replica 2	replica 3	Sum	Mort. (%)	Cum. mort. (%)		H Post-Infection	replica 1	replica 2	replica 3		H Post-Infection	replica 1	replica 2	replica 3	Average	standard deviation
	0	0	0	0	0	0	0		0	0	0	0		0	0	0	0	0	0
	12	0	0	0	0	0	0		12	0	0	0		12	0	0	0	0	0
	24	0	0	0	0	0	0		24	0	0	0		24	0	0	0	0	0
	36	0	0	0	0	0	0		36	0	0	0		36	0	0	0	0	0
	48	0	0	1	1	3.33333	3.33333		48	0	0	10		48	0	0	10	3.33333	5.7735
	60	0	0	0	0	0	3.33333		60	0	0	0		60	0	0	10	3.33333	5.7735
	72	0	0	0	0	0	3.33333		72	0	0	0		72	0	0	10	3.33333	5.7735
	84	0	0	0	0	0	3.33333		84	0	0	0		84	0	0	10	3.33333	5.7735
	96	0	0	0	0	0	3.33333		96	0	0	0		96	0	0	10	3.33333	5.7735
	108	0	0	0	0	0	3.33333		108	0	0	0		108	0	0	10	3.33333	5.7735
	120	0	0	0	0	0	3.33333		120	0	0	0		120	0	0	10	3.33333	5.7735
	132	0	0	0	0	0	3.33333		132	0	0	0		132	0	0	10	3.33333	5.7735
	144	0	0	0	0	0	3.33333		144	0	0	0		144	0	0	10	3.33333	5.7735
	156	0	0	0	0	0	3.33333		156	0	0	0		156	0	0	10	3.33333	5.7735
	168	0	0	0	0	0	3.33333		168	0	0	0		168	0	0	10	3.33333	5.7735
	180	0	0	0	0	0	3.33333		180	0	0	0		180	0	0	10	3.33333	5.7735
	192	0	0	0	0	0	3.33333		192	0	0	0		192	0	0	10	3.33333	5.7735
		0	0	1	1	3.33333				0	0	10
Control +	H Post-Infection	replica 1	replica 2	replica 3	Sum	Mort. (%)	Cum. mort. (%)		H Post-Infection	replica 1	replica 2	replica 3		H Post-Infection	replica 1	replica 2	replica 3	Average	standard deviation
	0	0	0	0	0	0	0		0	0	0	0		0	0	0	0	0	0
	12	0	0	0	0	0	0		12	0	0	0		12	0	0	0	0	0
	24	0	0	0	0	0	0		24	0	0	0		24	0	0	0	0	0
	36	0	0	0	0	0	0		36	0	0	0		36	0	0	0	0	0
	48	1	1	1	3	10	10		48	10	10	10		48	10	10	10	10	0
	60	1	1	1	3	10	20		60	10	10	10		60	20	20	20	20	0
	72	1	2	1	4	13.3333	33.3333		72	10	20	10		72	30	40	30	33.3333	5.7735
	84	1	1	1	3	10	43.3333		84	10	10	10		84	40	50	40	43.3333	5.7735
	96	0	0	0	0	0	43.3333		96	0	0	0		96	40	50	40	43.3333	5.7735
	108	0	0	0	0	0	43.3333		108	0	0	0		108	40	50	40	43.3333	5.7735
	120	0	0	0	0	0	43.3333		120	0	0	0		120	40	50	40	43.3333	5.7735
	132	0	0	0	0	0	43.3333		132	0	0	0		132	40	50	40	43.3333	5.7735
	144	0	0	0	0	0	43.3333		144	0	0	0		144	40	50	40	43.3333	5.7735
	156	0	0	0	0	0	43.3333		156	0	0	0		156	40	50	40	43.3333	5.7735
	168	0	0	0	0	0	43.3333		168	0	0	0		168	40	50	40	43.3333	5.7735
	180	0	0	0	0	0	43.3333		180	0	0	0		180	40	50	40	43.3333	5.7735
	192	0	0	0	0	0	43.3333		192	0	0	0		192	40	50	40	43.3333	5.7735
		4	5	4	13	43.3333				40	50	40
Control -	H Post-Infection	replica 1	replica 2	replica 3	Sum	Mort. (%)	Cum. mort. (%)		H Post-Infection	replica 1	replica 2	replica 3		H Post-Infection	replica 1	replica 2	replica 3	Average	standard deviation
	0	0	0	0	0	0	0		0	0	0	0		0	0	0	0	0	0
	12	0	0	0	0	0	0		12	0	0	0		12	0	0	0	0	0
	24	0	0	0	0	0	0		24	0	0	0		24	0	0	0	0	0
	36	0	0	0	0	0	0		36	0	0	0		36	0	0	0	0	0
	48	0	0	0	0	0	0		48	0	0	0		48	0	0	0	0	0
	60	0	0	0	0	0	0		60	0	0	0		60	0	0	0	0	0
	72	0	0	0	0	0	0		72	0	0	0		72	0	0	0	0	0
	84	0	0	0	0	0	0		84	0	0	0		84	0	0	0	0	0
	96	0	0	0	0	0	0		96	0	0	0		96	0	0	0	0	0
	108	0	0	0	0	0	0		108	0	0	0		108	0	0	0	0	0
	120	0	0	0	0	0	0		120	0	0	0		120	0	0	0	0	0
	132	0	0	0	0	0	0		132	0	0	0		132	0	0	0	0	0
	144	0	0	0	0	0	0		144	0	0	0		144	0	0	0	0	0
	156	0	0	0	0	0	0		156	0	0	0		156	0	0	0	0	0
	168	0	0	0	0	0	0		168	0	0	0		168	0	0	0	0	0
	180	0	0	0	0	0	0		180	0	0	0		180	0	0	0	0	0
	192	0	0	0	0	0	0		192	0	0	0		192	0	0	0	0	0
		0	0	0	0	0				0	0	0

## Sheet: Toxicity
1. DEAD SHRIMP PER TREATMENT									2. % MORTALITY					3. CUMULATIVE MORTALITY (%)								4. MORTALITY (ANOVA) by treatment
									n=10 shrimp per replica													Normalized data by ArcSen
10 µg/g	H Post-Infection	replica 1	replica 2	replica 3	Sum	Mort. (%)	Cum. mort. (%)		H Post-Infection	replica 1	replica 2	replica 3		H Post-Infection	replica 1	replica 2	replica 3	Average	standard deviation			Treatment	% Mort	Radians
	0	0	0	0	0	0	0		0	0	0	0		0	0	0	0	0	0			C+	0	0
	12	0	0	0	0	0	0		12	0	0	0		12	0	0	0	0	0			C+	0	0
	24	0	0	0	0	0	0		24	0	0	0		24	0	0	0	0	0			C+	0	0
	36	0	0	0	0	0	0		36	0	0	0		36	0	0	0	0	0			10 µg/g	0	0
	48	0	0	0	0	0	0		48	0	0	0		48	0	0	0	0	0			10 µg/g	0	0
	60	0	0	0	0	0	0		60	0	0	0		60	0	0	0	0	0			10 µg/g	0	0
	72	0	0	0	0	0	0		72	0	0	0		72	0	0	0	0	0			100 µg/g	0	0
	84	0	0	0	0	0	0		84	0	0	0		84	0	0	0	0	0			100 µg/g	0	0
	96	0	0	0	0	0	0		96	0	0	0		96	0	0	0	0	0			100 µg/g	0	0
	108	0	0	0	0	0	0		108	0	0	0		108	0	0	0	0	0			1000 µg/g	0	0
	120	0	0	0	0	0	0		120	0	0	0		120	0	0	0	0	0			1000 µg/g	0	0
	132	0	0	0	0	0	0		132	0	0	0		132	0	0	0	0	0			1000 µg/g	0	0
	144	0	0	0	0	0	0		144	0	0	0		144	0	0	0	0	0			C-	0	0
	156	0	0	0	0	0	0		156	0	0	0		156	0	0	0	0	0			C-	0	0
	168	0	0	0	0	0	0		168	0	0	0		168	0	0	0	0	0			C-	0	0
	180	0	0	0	0	0	0		180	0	0	0		180	0	0	0	0	0
	192	0	0	0	0	0	0		192	0	0	0		192	0	0	0	0	0
		0	0	0	0	0	0			0	0	0
100 µg/g	H Post-Infection	replica 1	replica 2	replica 3	Sum	Mort. (%)	Cum. mort. (%)		H Post-Infection	replica 1	replica 2	replica 3		H Post-Infection	replica 1	replica 2	replica 3	Average	standard deviation
	0	0	0	0	0	0	0		0	0	0	0		0	0	0	0	0	0
	12	0	0	0	0	0	0		12	0	0	0		12	0	0	0	0	0
	24	0	0	0	0	0	0		24	0	0	0		24	0	0	0	0	0
	36	0	0	0	0	0	0		36	0	0	0		36	0	0	0	0	0
	48	0	0	0	0	0	0		48	0	0	0		48	0	0	0	0	0
	60	0	0	0	0	0	0		60	0	0	0		60	0	0	0	0	0
	72	0	0	0	0	0	0		72	0	0	0		72	0	0	0	0	0
	84	0	0	0	0	0	0		84	0	0	0		84	0	0	0	0	0
	96	0	0	0	0	0	0		96	0	0	0		96	0	0	0	0	0
	108	0	0	0	0	0	0		108	0	0	0		108	0	0	0	0	0
	120	0	0	0	0	0	0		120	0	0	0		120	0	0	0	0	0
	132	0	0	0	0	0	0		132	0	0	0		132	0	0	0	0	0
	144	0	0	0	0	0	0		144	0	0	0		144	0	0	0	0	0
	156	0	0	0	0	0	0		156	0	0	0		156	0	0	0	0	0
	168	0	0	0	0	0	0		168	0	0	0		168	0	0	0	0	0
	180	0	0	0	0	0	0		180	0	0	0		180	0	0	0	0	0
	192	0	0	0	0	0	0		192	0	0	0		192	0	0	0	0	0
		0	0	0	0	0	0			0	0	0
1000 µg/g	H Post-Infection	replica 1	replica 2	replica 3	Sum	Mort. (%)	Cum. mort. (%)		H Post-Infection	replica 1	replica 2	replica 3		H Post-Infection	replica 1	replica 2	replica 3	Average	standard deviation
	0	0	0	0	0	0	0		0	0	0	0		0	0	0	0	0	0
	12	0	0	0	0	0	0		12	0	0	0		12	0	0	0	0	0
	24	0	0	0	0	0	0		24	0	0	0		24	0	0	0	0	0
	36	0	0	0	0	0	0		36	0	0	0		36	0	0	0	0	0
	48	0	0	0	0	0	0		48	0	0	0		48	0	0	0	0	0
	60	0	0	0	0	0	0		60	0	0	0		60	0	0	0	0	0
	72	0	0	0	0	0	0		72	0	0	0		72	0	0	0	0	0
	84	0	0	0	0	0	0		84	0	0	0		84	0	0	0	0	0
	96	0	0	0	0	0	0		96	0	0	0		96	0	0	0	0	0
	108	0	0	0	0	0	0		108	0	0	0		108	0	0	0	0	0
	120	0	0	0	0	0	0		120	0	0	0		120	0	0	0	0	0
	132	0	0	0	0	0	0		132	0	0	0		132	0	0	0	0	0
	144	0	0	0	0	0	0		144	0	0	0		144	0	0	0	0	0
	156	0	0	0	0	0	0		156	0	0	0		156	0	0	0	0	0
	168	0	0	0	0	0	0		168	0	0	0		168	0	0	0	0	0
	180	0	0	0	0	0	0		180	0	0	0		180	0	0	0	0	0
	192	0	0	0	0	0	0		192	0	0	0		192	0	0	0	0	0
		0	0	0	0	0	0			0	0	0
Control -	H Post-Infection	replica 1	replica 2	replica 3	Sum	Mort. (%)	Cum. mort. (%)		H Post-Infection	replica 1	replica 2	replica 3		H Post-Infection	replica 1	replica 2	replica 3	Average	standard deviation
	0	0	0	0	0	0	0		0	0	0	0		0	0	0	0	0	0
	12	0	0	0	0	0	0		12	0	0	0		12	0	0	0	0	0
	24	0	0	0	0	0	0		24	0	0	0		24	0	0	0	0	0
	36	0	0	0	0	0	0		36	0	0	0		36	0	0	0	0	0
	48	0	0	0	0	0	0		48	0	0	0		48	0	0	0	0	0
	60	0	0	0	0	0	0		60	0	0	0		60	0	0	0	0	0
	72	0	0	0	0	0	0		72	0	0	0		72	0	0	0	0	0
	84	0	0	0	0	0	0		84	0	0	0		84	0	0	0	0	0
	96	0	0	0	0	0	0		96	0	0	0		96	0	0	0	0	0
	108	0	0	0	0	0	0		108	0	0	0		108	0	0	0	0	0
	120	0	0	0	0	0	0		120	0	0	0		120	0	0	0	0	0
	132	0	0	0	0	0	0		132	0	0	0		132	0	0	0	0	0
	144	0	0	0	0	0	0		144	0	0	0		144	0	0	0	0	0
	156	0	0	0	0	0	0		156	0	0	0		156	0	0	0	0	0
	168	0	0	0	0	0	0		168	0	0	0		168	0	0	0	0	0
	180	0	0	0	0	0	0		180	0	0	0		180	0	0	0	0	0
	192	0	0	0	0	0	0		192	0	0	0		192	0	0	0	0	0
		0	0	0	0	0				0	0	0
