# Supplementary material for: Evaluation of a new Argovit as an antiviral agent included in feed to protect the shrimp Litopenaeus vannamei against White Spot Syndrome Virus infection
Source: PeerJ. 2020 Feb 27;8:e8446. doi: 10.7717/peerj.8446 (PMC7049459; doi:10.7717/peerj.8446)
Supplement: Supplemental Information 4 — The data correspond to each of the 5 genes evaluated in their relative-expression in the presence of Argovit-4. [file peerj-08-8446-s004.xlsx]

## Sheet: Raw data
			haemocytes
		B actin		PAP		PEN4		ProFO		Rab6		Crust		Cq average unadjusted						Cq average adjusted
		R1	R2	R1	R2	R1	R2	R1	R2	R1	R2	R1	R2	B-actin	PAP	PEN4	ProFO	Rab6	Crust	B-actin	PAP	PEN4	ProFO	Rab6	Crust
1	T0	18.005	18.0228	20.1065	20.1252	17.0915	17.2504	22.2216	22.372	26.6231	26.5109	17.13	16.9793	18.0139	20.1159	17.171	20.6147	26.567	17.0547	18.1668	19.7545	17.2766	20.9028	26.3452	17.0911
2	T0	17.8937	18.0426	20.1926	20.0577	17.7295	17.5075	21.9041	21.8969	26.7666	26.6401	17.0624	17.0795	17.9681	20.1251	17.6185	20.4362	26.7033	17.0709	18.121	19.7637	17.7241	20.7243	26.4816	17.1074
3	T0	19.0116	19.0179	19.5406	19.8785	17.4573	17.857	23.6839	23.2019	27.1792	27.2315	16.3152	17.1415	19.0147	19.7096	17.6572	21.5809	27.2054	16.7284	19.1676	19.3482	17.7628	21.8691	26.9836	16.7648
4	T0	19.2831	19.3164	21.186	21.0315	18.4136	18.4315	23.3439	23.2341	28.1802	27.814	18.0232	18.0632	19.2997	21.1088	18.4225	21.6698	27.9971	18.0432	19.4527	20.7474	18.5281	21.958	27.7754	18.0797
5	T0	17.0457	17.036	19.1636	18.9181	16.448	16.7473	20.6355	20.6763	25.3568	25.3487	16.9247	16.6315	17.0408	19.0408	16.5977	19.353	25.3528	16.7781	17.1938	18.6795	16.7033	19.6412	25.131	16.8146
6	Ctrol 6h	16.1638	16.1267	19.1058	19.0489	17.3194	17.4588	20.4838	20.2824	25.0717	25.0462	16.1978	16.2387	16.1453	19.0774	17.3891	19.4083	25.0589	16.2182	16.2982	18.716	17.4947	19.6965	24.8372	16.2547
7	Ctrol 6h	18.9629	18.765	20.3599	20.4619	19.8884	19.8997	24.158	24.438	27.6395	27.848	18.1339	18.2047	18.864	20.4109	19.894	22.8319	27.7438	18.1693	19.0169	20.0495	19.9996	23.12	27.522	18.2058
8	Ctrol 6h	18.0499	17.8979	19.6637	19.7611	17.6139	17.652	23.8017	23.3412	26.7567	26.7598	17.1095	17.2007	17.9739	19.7124	17.6329	21.5983	26.7582	17.1551	18.1269	19.351	17.7386	21.8865	26.5365	17.1916
9	Ctrol 6h	17.0811	16.9776	19.1824	19.2627	17.4299	17.296	21.2015	21.2103	25.4839	25.3045	15.9307	16.0004	17.0293	19.2225	17.363	19.9026	25.3942	15.9655	17.1822	18.8611	17.4686	20.1907	25.1724	16.002
10	Ctrol 6h	21.566	21.6098	23.3781	23.2459	22.1907	22.1902	27.6717	27.8599	30.5958	30.6478	20.5719	20.5263	21.5879	23.312	22.1904	25.9073	30.6218	20.5491	21.7408	22.9506	22.296	26.1954	30.4	20.5856
11	AgNP 6h	16.5477	16.3736	19.4893	19.2832	14.5603	14.1391	21.3022	21.2014	25.0574	25.0192	15.2643	15.115	16.4606	19.3862	14.3497	18.8809	25.0383	15.1897	16.6135	19.0249	14.4553	19.1691	24.8165	15.2262
12	AgNP 6h	20.2269	20.2141	21.5429	21.4622	21.283	21.0435	25.1573	25.084	28.2038	28.3073	19.4178	19.3635	20.2205	21.5026	21.1633	23.7616	28.2555	19.3907	20.3734	21.1412	21.2689	24.0498	28.0338	19.4271
13	AgNP 6h	17.42	17.3557	19.38	19.2179	17.9688	18.04	22.5377	22.4401	25.9922	26.0745	16.7054	16.7276	17.3878	19.2989	18.0044	21.0059	26.0333	16.7165	17.5407	18.9376	18.11	21.2941	25.8116	16.7529
14	AgNP 6h	18.1027	17.7681	19.9189	20.0096	19.0258	18.9364	22.9573	22.6574	26.5902	27.2488	18.2738	18.1258	17.9354	19.9642	18.9811	21.5171	26.9195	18.1998	18.0883	19.6028	19.0867	21.8052	26.6977	18.2362
15	AgNP 6h	16.9103	16.9441	19.0749	19.3068	16.2058	16.2521	21.1325	21.8383	25.608	25.5385	15.4594	15.7077	16.9272	19.1909	16.2289	19.741	25.5733	15.5835	17.0801	18.8295	16.3345	20.0291	25.3515	15.62
16	Ctrol 12h	17.1673	17.2515	18.9908	18.6872	16.7192	16.2551	22.1672	22.229	26.0391	26.0736	16.7364	16.6813	17.2094	18.839	16.4872	20.2171	26.0564	16.7089	17.3623	18.4776	16.5928	20.5053	25.8346	16.7453
17	Ctrol 12h	22.7616	22.8093	22.3901	22.5208	22.3978	23.0359	27.0071	27.2942	31.7825	32.2015	19.8192	19.8753	22.7855	22.4555	22.7169	25.7791	31.992	19.8473	22.9384	22.0941	22.8225	26.0672	31.7702	19.8837
18	Ctrol 12h	16.5024	16.4647	19.0645	18.9687	16.2389	16.2528	21.3031	21.3394	25.454	25.4287	15.618	15.6113	16.4835	19.0166	16.2458	19.6318	25.4413	15.6146	16.6365	18.6552	16.3514	19.9199	25.2196	15.6511
19	Ctrol 12h	21.1752	21.3692	23.1953	23.1581	21.811	21.6947	26.4788	26.4995	30.0563	30.0964	19.8571	19.6781	21.2722	23.1767	21.7528	24.891	30.0764	19.7676	21.4251	22.8153	21.8584	25.1792	29.8546	19.8041
20	Ctrol 12h	20.1798	20.2431	21.0947	21.0934	18.1187	18.4363	24.4228	24.3487	28.4326	28.2835	17.5633	17.5966	20.2115	21.0941	18.2775	22.4026	28.358	17.58	20.3644	20.7327	18.3831	22.6907	28.1363	17.6164
21	AgNP 12h	19.6315	19.6237	20.2966	20.1086	35.6687	36.463	25.7179	25.7373	27.4507	27.4921	18.0435	18.0575	19.6276	20.2026	36.0658	29.3061	27.4714	18.0505	19.7805	19.8412	36.1714	29.5942	27.2497	18.087
22	AgNP 12h	15.537	15.4692	18.4458	18.2869	15.6819	15.1834	20.3483	20.257	24.3288	24.3035	15.0279	14.6934	15.5031	18.3664	15.4326	18.5962	24.3161	14.8607	15.656	18.005	15.5383	18.8844	24.0944	14.8972
23	AgNP 12h	17.2107	17.3178	20.3969	20.4801	29.1828	29.5974	22.1119	22.1161	26.5531	26.5183	16.8295	16.796	17.2643	20.4385	29.3901	24.6085	26.5357	16.8127	17.4172	20.0771	29.4957	24.8966	26.3139	16.8492
24	AgNP 12h	22.6123	23.0843	23.2009	23.0893	21.9017	21.5377	27.4117	27.437	30.4068	30.537	21.3496	22.0069	22.8483	23.1451	21.7197	25.4621	30.4719	21.6783	23.0012	22.7837	21.8253	25.7503	30.2501	21.7147
25	AgNP 12h	17.0023	16.9285	19.1963	19.0101	16.0505	16.0355	21.4273	21.4647	25.4881	25.5361	16.0923	16.0124	16.9654	19.1032	16.043	19.6425	25.5121	16.0524	17.1183	18.7418	16.1486	19.9307	25.2903	16.0888
26	Ctrol 24h	17.9275	17.9361	20.1227	20.1009	17.9988	17.7489	22.3316	22.3717	26.4656	26.3856	17.523	17.5077	17.9318	20.1118	17.8739	20.8174	26.4256	17.5153	18.0847	19.7504	17.9795	21.1055	26.2038	17.5518
27	Ctrol 24h	20.3717	19.9817	20.7867	20.8476	20.6995	20.353	24.0675	24.106	27.9979	28.0409	18.59	18.6277	20.1767	20.8171	20.5263	22.8422	28.0194	18.6089	20.3296	20.4557	20.6319	23.1303	27.7977	18.6453
28	Ctrol 24h	23.7503	23.5104	25.0563	25.3013	22.6719	22.4626	26.6616	26.4801	31.7679	30.9957	21.6341	21.3228	23.6304	25.1788	22.5673	25.2015	31.3818	21.4785	23.7833	24.8174	22.6729	25.4896	31.16	21.5149
29	Ctrol 24h	14.982	14.9964	17.7514	17.5051	17.3635	16.9476	18.3162	18.3651	23.6072	23.5576	15.1979	14.4863	14.9892	17.6283	17.1555	17.8763	23.5824	14.8421	15.1421	17.2669	17.2611	18.1644	23.3606	14.8786
30	Ctrol 24h	17.079	16.6931	18.77	18.4354	18.2717	17.5863	21.659	21.59	25.0843	25.0647	17.0721	17.1254	16.8861	18.6027	17.929	20.2784	25.0745	17.0988	17.039	18.2413	18.0346	20.5666	24.8527	17.1352
31	AgNPs 24h	22.6979	22.7739	23.4164	23.9483	22.4731	22.5107	27.3217	27.282	30.6112	30.3183	21.0721	21.6152	22.7359	23.6824	22.4919	25.7048	30.4647	21.3437	22.8888	23.321	22.5975	25.993	30.243	21.3801
32	AgNPs 24h	17.7154	17.323	20.1618	19.8807	21.318	21.0794	23.2858	23.3268	26.3798	26.114	16.5467	16.4335	17.5192	20.0212	21.1987	22.564	26.2469	16.4901	17.6721	19.6598	21.3043	22.8522	26.0251	16.5266
33	AgNPs 24h	20.0449	20.0802	21.7408	21.5192	23.3419	23.473	25.3531	25.4941	28.4111	28.1033	20.189	19.6979	20.0626	21.63	23.4075	24.7734	28.2572	19.9434	20.2155	21.2686	23.5131	25.0616	28.0355	19.9799
34	AgNPs 24h	18.1782	18.2161	19.9002	19.8129	20.3831	20.734	22.4208	22.8649	26.2081	26.1381	17.9503	17.9543	18.1971	19.8566	20.5585	22.0066	26.1731	17.9523	18.35	19.4952	20.6642	22.2948	25.9513	17.9887
35	AgNPs 24h	17.6154	17.3884	18.9569	18.8488	19.4142	19.9436	21.6667	21.558	24.45	24.5742	15.7411	15.388	17.5019	18.9029	19.6789	21.0561	24.5121	15.5646	17.6548	18.5415	19.7845	21.3443	24.2903	15.601
36	Ctrol 48h	20.907	20.963	21.8787	21.8731	21.9172	22.1202	25.0742	24.9727	28.4908	28.3926	16.1197	19.1427	20.935	21.8759	22.0187	24.0557	28.4417	17.6312	21.0879	21.5145	22.1243	24.3439	28.2199	17.6677
37	Ctrol 48h	20.7497	20.5095	21.9132	21.9635	23.5291	23.4116	26.1414	26.2401	28.3458	28.2164	20.5169	20.5618	20.6296	21.9384	23.4703	25.2644	28.2811	20.5394	20.7825	21.577	23.576	25.5525	28.0594	20.5758
38	Ctrol 48h	21.3862	21.4077	22.085	22.0178	22.6065	22.4602	24.9158	24.5463	28.3716	28.6101	20.353	20.4857	21.3969	22.0514	22.5334	23.9741	28.4908	20.4194	21.5499	21.69	22.639	24.2623	28.2691	20.4558
39	Ctrol 48h	19.1901	19.2081	19.5779	19.5009	20.5187	20.5139	22.1537	22.1501	25.8788	25.8913	17.4668	17.4678	19.1991	19.5394	20.5163	21.6059	25.885	17.4673	19.352	19.1781	20.6219	21.8941	25.6633	17.5037
40	Ctrol 48h	21.2887	21.1788	22.3157	22.2671	23.8419	24.0678	25.6408	25.4231	28.352	28.293	20.4175	20.3888	21.2338	22.2914	23.9548	25.0439	28.3225	20.4032	21.3867	21.93	24.0604	25.3321	28.1007	20.4396
41	AgNPs 48h	21.8287	21.7884	21.7536	21.769	23.1726	23.2529	26.0935	26.2055	29.2633	29.2906	19.3474	19.3128	21.8085	21.7613	23.2128	25.184	29.2769	19.3301	21.9614	21.3999	23.3184	25.4721	29.0552	19.3666
42	AgNPs 48h	18.6095	18.5812	19.6319	19.623	20.7044	20.7677	23.0109	23.0633	26.3684	26.4957	16.8944	16.4712	18.5954	19.6275	20.7361	22.2806	26.432	16.6828	18.7483	19.2661	20.8417	22.5688	26.2103	16.7193
43	AgNPs 48h	22.6862	22.8132	22.232	22.6593	24.0117	24.1838	27.3482	27.1258	30.9522	30.9258	20.2994	20.2404	22.7497	22.4457	24.0978	26.2193	30.939	20.2699	22.9026	22.0843	24.2034	26.5074	30.7172	20.3064
44	AgNPs 48h	20.8048	20.4744	20.3366	20.4042	22.0605	22.0879	26.3768	26.4573	28.1986	28.2099	18.1785	17.7184	20.6396	20.3704	22.0742	24.974	28.2043	17.9484	20.7925	20.009	22.1798	25.2622	27.9825	17.9849
45	AgNPs 48h	20.0338	19.8614	20.9459	20.8746	22.1173	22.1462	24.3202	24.1498	27.8412	28.0606	18.0598	17.9503	19.9476	20.9103	22.1317	23.5387	27.9509	18.005	20.1005	20.5489	22.2373	23.8269	27.7292	18.0415
													Adjusters
													1	23.5969	23.4595	24.4162	24.0323	24.0679	23.6921
													2	23.6137	23.5448	23.5118	23.6719	23.5645	23.7672
													3	23.4933	23.7289	23.6425	23.8114	23.9386	23.6964
													4	23.6279	22.576	23.2547	23.6279	22.576	23.2547
													5	23.8483	22.1883	23.2059	23.8483	22.1883	23.2059
													6	23.4442	23.041	23.3094	23.4442	23.041	23.3094
													Average/plate	23.6041	23.0898	23.5568	23.7393	23.2294	23.4876
													General average	23.4511	23.4511	23.4511	23.4511	23.4511	23.4511
													Difference/plate	0.152912	-0.361388	0.105606	0.288165	-0.221763	0.0364679

## Sheet: Gene expression
																			ΔCq Target gene					E^ΔCq Target gene					ΔCq Reference gene	E^ΔCq Reference gene
Efficiency	1.994	2.007	1.934	1.996	1.938	1.966	Reference gene in the control	Target gene in the control					Reference gene in the experiment	Target gene in the experiment					Cq (control) Target gene - Cq (experiment) Target gene					Pfaffl equation of the numerator					Cq (control) Ref gene - Cq (experiment) Ref gene	Pfaffl equation of the denominator	Relative expression
	b-actina	PAP	PEN4	ProPO	Rab6	Crust	b-actin	PAP	PEN4	ProPO	Rab6	Crust	b-actin	PAP	PEN4	ProPO	Rab6	Crust	PAP	PEN4	ProPO	Rab6	Crust	PAP	PEN4	ProPO	Rab6	Crust	ΔCq de B-actin	E^ΔCq de B-actin	PAP	PEN4	ProPO	Rab6	Crust
T0	18.1668	19.7545	17.2766	20.9028	26.3452	17.0911	18.1668	19.7545	17.2766	20.9028	26.3452	17.0911	18.1668	19.7545	17.2766	20.9028	26.3452	17.0911	0	0	0	0	0	1	1	1	1	1	0	1	1	1	1	1	1
T0	19.4527	20.7474	18.5281	21.958	27.7754	18.0797	19.4527	20.7474	18.5281	21.958	27.7754	18.0797	19.4527	20.7474	18.5281	21.958	27.7754	18.0797	0	0	0	0	0	1	1	1	1	1	0	1	1	1	1	1	1
T0	17.1938	18.6795	16.7033	19.6412	25.131	16.8146	17.1938	18.6795	16.7033	19.6412	25.131	16.8146	17.1938	18.6795	16.7033	19.6412	25.131	16.8146	0	0	0	0	0	1	1	1	1	1	0	1	1	1	1	1	1
Ctrol 6h	16.2982	18.716	17.4947	19.6965	24.8372	16.2547	18.1668	19.7545	17.2766	20.9028	26.3452	17.0911	16.2982	18.716	17.4947	19.6965	24.8372	16.2547	1.03853	-0.218095	1.20636	1.50805	0.836425	2.0616	0.866015	2.30198	2.71235	1.76019	1.86861	3.63135	0.567722	0.238483	0.633919	0.746925	0.484722
Ctrol 6h	19.0169	20.0495	19.9996	23.12	27.522	18.2058	18.121	19.7637	17.7241	20.7243	26.4816	17.1074	19.0169	20.0495	19.9996	23.12	27.522	18.2058	-0.285734	-2.27552	-2.39569	-1.04042	-1.0984	0.819506	0.222926	0.190945	0.502377	0.475912	-0.895827	0.538887	1.52074	0.413679	0.354332	0.932249	0.883139
Ctrol 6h	18.1269	19.351	17.7386	21.8865	26.5365	17.1916	19.1676	19.3482	17.7628	21.8691	26.9836	16.7648	18.1269	19.351	17.7386	21.8865	26.5365	17.1916	-0.00280829	0.0242101	-0.0173715	0.447154	-0.426745	0.998046	1.0161	0.988066	1.34428	0.749402	1.04078	2.05091	0.486635	0.495437	0.481769	0.655457	0.365399
Ctrol 6h	17.1822	18.8611	17.4686	20.1907	25.1724	16.002	19.4527	20.7474	18.5281	21.958	27.7754	18.0797	17.1822	18.8611	17.4686	20.1907	25.1724	16.002	1.88622	1.05958	1.76726	2.60293	2.07767	3.72111	2.01152	3.39204	5.59708	4.07352	2.27041	4.7918	0.776557	0.419784	0.707884	1.16805	0.850101
Ctrol 6h	21.7408	22.9506	22.296	26.1954	30.4	20.5856	17.1938	18.6795	16.7033	19.6412	25.131	16.8146	21.7408	22.9506	22.296	26.1954	30.4	20.5856	-4.27112	-5.59279	-6.55423	-5.26904	-3.77099	0.0510251	0.0249982	0.0107815	0.0306141	0.0781449	-4.54704	0.043365	1.17664	0.576461	0.248622	0.705962	1.80203
AgNP 6h	16.6135	19.0249	14.4553	19.1691	24.8165	15.2262	18.1668	19.7545	17.2766	20.9028	26.3452	17.0911	16.6135	19.0249	14.4553	19.1691	24.8165	15.2262	0.72964	2.82127	1.73375	1.52868	1.86496	1.66246	6.42942	3.31439	2.74961	3.52795	1.55324	2.92109	0.569123	2.20104	1.13464	0.941298	1.20775
AgNP 6h	20.3734	21.1412	21.2689	24.0498	28.0338	19.4271	18.121	19.7637	17.7241	20.7243	26.4816	17.1074	20.3734	21.1412	21.2689	24.0498	28.0338	19.4271	-1.37745	-3.54475	-3.32544	-1.55221	-2.31974	0.383051	0.0965124	0.100423	0.35807	0.208431	-2.25239	0.211301	1.81282	0.456753	0.475261	1.69459	0.986416
AgNP 6h	17.5407	18.9376	18.11	21.2941	25.8116	16.7529	19.1676	19.3482	17.7628	21.8691	26.9836	16.7648	17.5407	18.9376	18.11	21.2941	25.8116	16.7529	0.410648	-0.347247	0.575019	1.17204	0.0118999	1.33119	0.795296	1.48798	2.17165	1.00808	1.62689	3.0734	0.433133	0.258768	0.484149	0.706596	0.328001
AgNP 6h	18.0883	19.6028	19.0867	21.8052	26.6977	18.2362	19.4527	20.7474	18.5281	21.958	27.7754	18.0797	18.0883	19.6028	19.0867	21.8052	26.6977	18.2362	1.14454	-0.558573	0.15275	1.07766	-0.156552	2.21962	0.69182	1.11135	2.04019	0.899578	1.36437	2.5641	0.86565	0.26981	0.433425	0.795675	0.350835
AgNP 6h	17.0801	18.8295	16.3345	20.0291	25.3515	15.62	17.1938	18.6795	16.7033	19.6412	25.131	16.8146	17.0801	18.8295	16.3345	20.0291	25.3515	15.62	-0.150013	0.368715	-0.387936	-0.220507	1.19456	0.90077	1.27532	0.764816	0.864244	2.24235	0.113647	1.08159	0.83282	1.17912	0.707122	0.799049
Ctrol 12h	17.3623	18.4776	16.5928	20.5053	25.8346	16.7453	18.1668	19.7545	17.2766	20.9028	26.3452	17.0911	17.3623	18.4776	16.5928	20.5053	25.8346	16.7453	1.27687	0.683811	0.397563	0.510629	0.345795	2.43396	1.56994	1.31623	1.40195	1.26334	0.804437	1.74225	1.39702	0.901098	0.755479	0.804676	0.72512
Ctrol 12h	22.9384	22.0941	22.8225	26.0672	31.7702	19.8837	18.121	19.7637	17.7241	20.7243	26.4816	17.1074	22.9384	22.0941	22.8225	26.0672	31.7702	19.8837	-2.33035	-5.09835	-5.34288	-5.28866	-2.77632	0.197223	0.0346373	0.0249045	0.0302193	0.15308	-4.81733	0.0359852	5.48068	0.962542	0.692076	0.839769	4.25396
Ctrol 12h	16.6365	18.6552	16.3514	19.9199	25.2196	15.6511	19.1676	19.3482	17.7628	21.8691	26.9836	16.7648	16.6365	18.6552	16.3514	19.9199	25.2196	15.6511	0.693012	1.41132	1.94916	1.76404	1.11375	1.62057	2.53677	3.84646	3.21295	2.12314	2.53118	5.73663	0.282496	0.442206	0.670508	0.560076	0.370102
Ctrol 12h	21.4251	22.8153	21.8584	25.1792	29.8546	19.8041	19.4527	20.7474	18.5281	21.958	27.7754	18.0797	21.4251	22.8153	21.8584	25.1792	29.8546	19.8041	-2.06797	-3.33029	-3.22118	-2.07924	-1.7244	0.236779	0.111177	0.107926	0.252652	0.311705	-1.97245	0.256334	0.923711	0.43372	0.421038	0.985635	1.21601
Ctrol 12h	20.3644	20.7327	18.3831	22.6907	28.1363	17.6164	17.1938	18.6795	16.7033	19.6412	25.131	16.8146	20.3644	20.7327	18.3831	22.6907	28.1363	17.6164	-2.05322	-1.67983	-3.04955	-3.00528	-0.801853	0.239224	0.330218	0.121519	0.136906	0.581553	-3.17064	0.112119	2.13366	2.94524	1.08384	1.22107	5.18692
AgNP 12h	19.7805	19.8412	36.1714	29.5942	27.2497	18.087	18.1668	19.7545	17.2766	20.9028	26.3452	17.0911	19.7805	19.8412	36.1714	29.5942	27.2497	18.087	-0.086686	-18.8948	-8.69138	-0.904437	-0.995846	0.941398	3.8677e-06	0.00246144	0.549676	0.510077	-1.61373	0.32834	2.86715	1.17796e-05	0.00749664	1.67411	1.5535
AgNP 12h	15.656	18.005	15.5383	18.8844	24.0944	14.8972	18.121	19.7637	17.7241	20.7243	26.4816	17.1074	15.656	18.005	15.5383	18.8844	24.0944	14.8972	1.75877	2.18586	1.83994	2.38719	2.21024	3.40495	4.22817	3.56679	4.85254	4.45542	2.46504	5.48066	0.621266	0.771471	0.650796	0.885394	0.812935
AgNP 12h	17.4172	20.0771	29.4957	24.8966	26.3139	16.8492	19.1676	19.3482	17.7628	21.8691	26.9836	16.7648	17.4172	20.0771	29.4957	24.8966	26.3139	16.8492	-0.728909	-11.733	-3.02755	0.669691	-0.0843505	0.601825	0.00043553	0.123381	1.55754	0.944574	1.75046	3.347	0.17981	0.000130126	0.0368633	0.465353	0.282215
AgNP 12h	23.0012	22.7837	21.8253	25.7503	30.2501	21.7147	19.4527	20.7474	18.5281	21.958	27.7754	18.0797	23.0012	22.7837	21.8253	25.7503	30.2501	21.7147	-2.03636	-3.29716	-3.79228	-2.47477	-3.63507	0.242051	0.113634	0.0727288	0.194476	0.0856651	-3.54855	0.0863796	2.80217	1.31551	0.841967	2.25141	0.991728
AgNP 12h	17.1183	18.7418	16.1486	19.9307	25.2903	16.0888	17.1938	18.6795	16.7033	19.6412	25.131	16.8146	17.1183	18.7418	16.1486	19.9307	25.2903	16.0888	-0.0623367	0.554655	-0.289476	-0.159325	0.725749	0.957503	1.44173	0.818674	0.899948	1.63331	0.075482	1.05347	0.9089	1.36855	0.777118	0.854267	1.5504
Ctrol 24h	18.0847	19.7504	17.9795	21.1055	26.2038	17.5518	18.1668	19.7545	17.2766	20.9028	26.3452	17.0911	18.0847	19.7504	17.9795	21.1055	26.2038	17.5518	0.0040476	-0.70288	-0.202698	0.141403	-0.460683	1.00282	0.629007	0.869277	1.09808	0.732405	0.0820683	1.05827	0.947603	0.594371	0.821411	1.03761	0.692075
Ctrol 24h	20.3296	20.4557	20.6319	23.1303	27.7977	18.6453	18.121	19.7637	17.7241	20.7243	26.4816	17.1074	20.3296	20.4557	20.6319	23.1303	27.7977	18.6453	-0.692009	-2.90776	-2.40599	-1.31608	-1.53793	0.617496	0.146911	0.189591	0.418619	0.353581	-2.20855	0.217793	2.83525	0.674545	0.870512	1.9221	1.62347
Ctrol 24h	23.7833	24.8174	22.6729	25.4896	31.16	21.5149	19.1676	19.3482	17.7628	21.8691	26.9836	16.7648	23.7833	24.8174	22.6729	25.4896	31.16	21.5149	-5.46918	-4.9101	-3.62053	-4.1764	-4.75009	0.0221469	0.0392166	0.0818952	0.0630807	0.0403136	-4.61564	0.0413597	0.53547	0.948184	1.98007	1.52517	0.974706
Ctrol 24h	15.1421	17.2669	17.2611	18.1644	23.3606	14.8786	19.4527	20.7474	18.5281	21.958	27.7754	18.0797	15.1421	17.2669	17.2611	18.1644	23.3606	14.8786	3.48048	1.26701	3.79355	4.41475	3.2011	11.2982	2.30644	13.7617	18.5608	8.70543	4.31058	19.588	0.576795	0.117748	0.702561	0.947561	0.444427
Ctrol 24h	17.039	18.2413	18.0346	20.5666	24.8527	17.1352	17.1938	18.6795	16.7033	19.6412	25.131	16.8146	17.039	18.2413	18.0346	20.5666	24.8527	17.1352	0.438138	-1.33135	-0.925392	0.278261	-0.320654	1.35693	0.415552	0.527514	1.20215	0.805121	0.154759	1.11272	1.21947	0.373456	0.474077	1.08037	0.723563
AgNPs 24h	22.8888	23.321	22.5975	25.993	30.243	21.3801	18.1668	19.7545	17.2766	20.9028	26.3452	17.0911	22.8888	23.321	22.5975	25.993	30.243	21.3801	-3.5665	-5.32091	-5.09014	-3.89776	-4.289	0.0833614	0.0299082	0.0296579	0.0758517	0.0550578	-4.72204	0.0384315	2.16909	0.778222	0.77171	1.97369	1.43262
AgNPs 24h	17.6721	19.6598	21.3043	22.8522	26.0251	16.5266	18.121	19.7637	17.7241	20.7243	26.4816	17.1074	17.6721	19.6598	21.3043	22.8522	26.0251	16.5266	0.103907	-3.58019	-2.12783	0.456434	0.580807	1.07507	0.0942824	0.229778	1.35256	1.48086	0.448945	1.3632	0.788636	0.0691625	0.168557	0.992198	1.08631
AgNPs 24h	20.2155	21.2686	23.5131	25.0616	28.0355	19.9799	19.1676	19.3482	17.7628	21.8691	26.9836	16.7648	20.2155	21.2686	23.5131	25.0616	28.0355	19.9799	-1.92037	-5.7503	-3.1925	-1.05185	-3.21506	0.26242	0.0225315	0.110087	0.498592	0.113792	-1.04786	0.485209	0.54084	0.0464367	0.226886	1.02758	0.234521
AgNPs 24h	18.35	19.4952	20.6642	22.2948	25.9513	17.9887	19.4527	20.7474	18.5281	21.958	27.7754	18.0797	18.35	19.4952	20.6642	22.2948	25.9513	17.9887	1.25217	-2.13601	-0.336767	1.82403	0.0909362	2.39244	0.244414	0.792348	3.34305	1.0634	1.10261	2.14033	1.11779	0.114194	0.370198	1.56193	0.496839
AgNPs 24h	17.6548	18.5415	19.7845	21.3443	24.2903	15.601	17.1938	18.6795	16.7033	19.6412	25.131	16.8146	17.6548	18.5415	19.7845	21.3443	24.2903	15.601	0.137987	-3.08126	-1.70307	0.840649	1.21353	1.1009	0.131025	0.308182	1.74407	2.27129	-0.461033	0.727473	1.51332	0.18011	0.423633	2.39744	3.12216
Ctrol 48h	21.0879	21.5145	22.1243	24.3439	28.2199	17.6677	18.1668	19.7545	17.2766	20.9028	26.3452	17.0911	21.0879	21.5145	22.1243	24.3439	28.2199	17.6677	-1.76	-4.84771	-3.44103	-1.87471	-0.576561	0.293439	0.040864	0.0927123	0.289265	0.677222	-2.9211	0.13319	2.20316	0.30681	0.696091	2.17182	5.08463
Ctrol 48h	20.7825	21.577	23.576	25.5525	28.0594	20.5758	18.121	19.7637	17.7241	20.7243	26.4816	17.1074	20.7825	21.577	23.576	25.5525	28.0594	20.5758	-1.81326	-5.85184	-4.82818	-1.57777	-3.46843	0.282751	0.0210718	0.0355444	0.352063	0.0958798	-2.66147	0.159328	1.77465	0.132254	0.22309	2.20968	0.601777
Ctrol 48h	21.5499	21.69	22.639	24.2623	28.2691	20.4558	19.1676	19.3482	17.7628	21.8691	26.9836	16.7648	21.5499	21.69	22.639	24.2623	28.2691	20.4558	-2.34181	-4.87619	-2.39321	-1.28547	-3.69101	0.195655	0.0401035	0.191272	0.427186	0.0824861	-2.38222	0.193192	1.01275	0.207584	0.990064	2.2112	0.426965
Ctrol 48h	19.352	19.1781	20.6219	21.8941	25.6633	17.5037	19.4527	20.7474	18.5281	21.958	27.7754	18.0797	19.352	19.1781	20.6219	21.8941	25.6633	17.5037	1.56932	-2.09378	0.0638987	2.11208	0.575935	2.98397	0.251318	1.04515	4.04497	1.476	0.100607	1.0719	2.78381	0.23446	0.975046	3.77364	1.37699
Ctrol 48h	21.3867	21.93	24.0604	25.3321	28.1007	20.4396	17.1938	18.6795	16.7033	19.6412	25.131	16.8146	21.3867	21.93	24.0604	25.3321	28.1007	20.4396	-3.25058	-7.35719	-5.69087	-2.96975	-3.62506	0.103884	0.00780703	0.0195806	0.140163	0.0862465	-4.19293	0.0553697	1.87618	0.140998	0.353634	2.53139	1.55765
AgNPs 48h	21.9614	21.3999	23.3184	25.4721	29.0552	19.3666	18.1668	19.7545	17.2766	20.9028	26.3452	17.0911	21.9614	21.3999	23.3184	25.4721	29.0552	19.3666	-1.64541	-6.04181	-4.56929	-2.70995	-2.27545	0.317822	0.0185902	0.0425089	0.166451	0.214766	-3.79467	0.0728858	4.36055	0.25506	0.583226	2.28372	2.94661
AgNPs 48h	18.7483	19.2661	20.8417	22.5688	26.2103	16.7193	18.121	19.7637	17.7241	20.7243	26.4816	17.1074	18.7483	19.2661	20.8417	22.5688	26.2103	16.7193	0.497669	-3.11756	-1.84445	0.271303	0.388118	1.41439	0.127925	0.279491	1.19663	1.30001	-0.627255	0.648628	2.18058	0.197224	0.430895	1.84486	2.00424
AgNPs 48h	22.9026	22.0843	24.2034	26.5074	30.7172	20.3064	19.1676	19.3482	17.7628	21.8691	26.9836	16.7648	22.9026	22.0843	24.2034	26.5074	30.7172	20.3064	-2.73608	-6.4406	-4.63834	-3.73363	-3.54154	0.148664	0.0142905	0.040528	0.0845528	0.0912563	-3.73497	0.0759515	1.95735	0.188153	0.533603	1.11325	1.20151
AgNPs 48h	20.7925	20.009	22.1798	25.2622	27.9825	17.9849	19.4527	20.7474	18.5281	21.958	27.7754	18.0797	20.7925	20.009	22.1798	25.2622	27.9825	17.9849	0.738398	-3.65167	-3.30417	-0.207149	0.0947873	1.67263	0.0899408	0.10191	0.871916	1.06617	-1.33984	0.396658	4.21682	0.226747	0.256922	2.19816	2.68789
AgNPs 48h	20.1005	20.5489	22.2373	23.8269	27.7292	18.0415	17.1938	18.6795	16.7033	19.6412	25.131	16.8146	20.1005	20.5489	22.2373	23.8269	27.7292	18.0415	-1.86941	-5.53406	-4.1857	-2.59817	-1.22692	0.271904	0.0259855	0.0554137	0.179228	0.436311	-2.90675	0.134516	2.02135	0.193178	0.41195	1.33239	3.24357

## Sheet: PAP
Relative expression of the PAP gene from shrimp haemocytes treated with AgNPs
PAP
expression			0h		6h		12h		24h		48h					Normalized data (Log10)
n=3			Control	AgNPs	Control	AgNPs	Control	AgNPs	Control	AgNPs	Control	AgNPs			PAP	expression	log10
			1	1	0.567722	0.569123	1.39702	0.621266	0.947603	0.788636	2.20316	2.18058			T0 Control	1	0
			1	1	0.486635	0.86565	0.282496	0.17981	0.53547	0.54084	1.77465	1.95735			T0 Control	1	0
			1	1	0.776557	0.83282	0.923711	0.9089	0.576795	1.11779	1.87618	2.02135			T0 Control	1	0
		Average	1	1	0.610305	0.755864	0.867743	0.569992	0.686623	0.815756	1.95133	2.0531			T0 AgNPs	1	0
		Stand desv	0	0	0.149578	0.162554	0.559367	0.367239	0.226958	0.28943	0.223922	0.114951			T0 AgNPs	1	0
		Stand error	0	0	0.086359	0.0938504	0.322951	0.212026	0.131035	0.167103	0.129282	0.066367			T0 AgNPs	1	0
															6h Control	0.567722	-0.245865
															6h Control	0.486635	-0.312796
			0	6	12	24	48								6h Control	0.776557	-0.109827
		Control	1	0.610305	0.867743	0.686623	1.95133	0	0.149578	0.559367	0.226958	0.223922			6h AgNPs	0.569123	-0.244794
		Argovit-4	1	0.755864	0.569992	0.815756	2.0531	0	0.162554	0.367239	0.28943	0.114951			6h AgNPs	0.86565	-0.0626575
															6h AgNPs	0.83282	-0.0794489
															12h Control	1.39702	0.145203
															12h Control	0.282496	-0.548988
															12h Control	0.923711	-0.034464
															12h AgNPs	0.621266	-0.206723
															12h AgNPs	0.17981	-0.745185
															12h AgNPs	0.9089	-0.0414837
															24h Control	0.947603	-0.0233733
															24h Control	0.53547	-0.271265
															24h Control	0.576795	-0.238978
															24h AgNPs	0.788636	-0.103123
															24h AgNPs	0.54084	-0.266931
															24h AgNPs	1.11779	0.0483605
															48h Control	2.20316	0.343046
															48h Control	1.77465	0.249112
															48h Control	1.87618	0.273275
															48h AgNPs	2.18058	0.338573
															48h AgNPs	1.95735	0.291669
															48h AgNPs	2.02135	0.305642

## Sheet: Crustin
Relative expression of the Crustin gene from shrimp haemocytes treated with AgNPs
Crustin															Normalized data (Log10)
Expression		Ctrol 0h	AgNP 0h	Ctrol 6h	AgNP 6h	Ctrol 12h	AgNP 12h	Ctrol 24h	AgNPs 24h	Ctrol 48h	AgNPs 48h			Crustin	expression	log10
n=3		1	1	0.484722	0.986416	0.72512	1.5535	0.692075	1.08631	5.08463	2.94661			T0 Control	1	0
		1	1	0.883139	0.328001	0.370102	0.991728	0.444427	0.234521	1.37699	2.00424			T0 Control	1	0
		1	1	0.850101	0.350835	1.21601	1.5504	0.723563	0.496839	1.55765	2.68789			T0 Control	1	0
	Average	1	1	0.739321	0.555084	0.770411	1.36521	0.620022	0.605891	2.67309	2.54625			T0 AgNPs	1	0
	Stand desv	0	0	0.221107	0.373719	0.424769	0.32345	0.152882	0.436242	2.09041	0.486894			T0 AgNPs	1	0
	Stand error	0	0	0.127656	0.215767	0.245241	0.186744	0.0882664	0.251864	1.2069	0.281108			T0 AgNPs	1	0
														6h Control	0.484722	-0.314508
														6h Control	0.883139	-0.0539711
		0	6	12	24	48								6h Control	0.850101	-0.0705292
	Control	1	0.739321	0.770411	0.620022	2.67309	0	0.127656	0.245241	0.0882664	1.21			6h AgNPs	0.986416	-0.00593972
	Argovit-4	1	0.555084	1.36521	0.605891	2.54625	0	0.215767	0.186744	0.251864	0.281108			6h AgNPs	0.328001	-0.484125
														6h AgNPs	0.350835	-0.454897
														12h Control	0.72512	-0.13959
														12h Control	0.370102	-0.431679
														12h Control	1.21601	0.0849374
														12h AgNPs	1.5535	0.191312
														12h AgNPs	0.991728	-0.00360739
														12h AgNPs	1.5504	0.190444
														24h Control	0.692075	-0.159847
														24h Control	0.444427	-0.352199
														24h Control	0.723563	-0.140524
														24h AgNPs	1.08631	0.0359553
														24h AgNPs	0.234521	-0.629818
														24h AgNPs	0.496839	-0.303784
														48h Control	5.08463	0.70626
														48h Control	1.37699	0.13893
														48h Control	1.55765	0.192469
														48h AgNPs	2.94661	0.469323
														48h AgNPs	2.00424	0.301949
														48h AgNPs	2.68789	0.429412

## Sheet: Rab6
Relative expression of the Rab6 gene from shrimp haemocytes treated with AgNPs
																	Normalized data (Log10)
Rab6															Rab6	expression	log10		Rab6	expresion	log10
expression		Ctrol 0h	AgNP 0h	Ctrol 6h	AgNP 6h	Ctrol 12h	AgNP 12h	Ctrol 24h	AgNPs 24h	Ctrol 48h	AgNPs 48h				T0 Control	1	0		T0 AgNPs	1	0
n=3		1	1	0.746925	0.706596	0.804676	0.885394	1.03761	0.992198	2.17182	2.28372				T0 Control	1	0		T0 AgNPs	1	0
		1	1	0.655457	0.795675	0.839769	0.465353	0.947561	1.02758	2.20968	1.84486				T0 Control	1	0		T0 AgNPs	1	0
		1	1	0.705962	0.799049	0.985635	0.854267	1.08037	1.56193	2.2112	2.19816				6h Control	0.746925	-0.126723		6h AgNPs	0.706596	-0.150829
	Average	1	1	0.702782	0.767107	0.876693	0.735005	1.02185	1.1939	2.19757	2.10892				6h Control	0.655457	-0.183455		6h AgNPs	0.795675	-0.0992643
	Stand desv	0	0	0.0458165	0.0524308	0.0959639	0.234043	0.0677956	0.319211	0.0223109	0.232643				6h Control	0.705962	-0.151218		6h AgNPs	0.799049	-0.0974264
	Stand error	0	0	0.0264522	0.0302709	0.0554048	0.135125	0.0391418	0.184297	0.0128812	0.134317				12h Control	0.804676	-0.0943789		12h AgNPs	0.885394	-0.0528636
															12h Control	0.839769	-0.0758404		12h AgNPs	0.465353	-0.332217
															12h Control	0.985635	-0.00628404		12h AgNPs	0.854267	-0.0684065
		0	6	12	24	48									24h Control	1.03761	0.0160349		24h AgNPs	0.992198	-0.00340186
	Control	1	0.702782	0.876693	1.02185	2.19757	0	0.0458165	0.0959639	0.0677956	0.0223109				24h Control	0.947561	-0.023393		24h AgNPs	1.02758	0.0118167
	Argovit-4	1	0.767107	0.735005	1.1939	2.10892	0	0.0524308	0.234043	0.319211	0.232643				24h Control	1.08037	0.0335743		24h AgNPs	1.56193	0.193661
															48h Control	2.17182	0.336824		48h AgNPs	2.28372	0.358644
															48h Control	2.20968	0.34433		48h AgNPs	1.84486	0.265964
															48h Control	2.2112	0.344628		48h AgNPs	2.19816	0.342059

## Sheet: PEN4
	Relative expression of the PEN4 gene from shrimp haemocytes treated with AgNPs
		PEN4														Normalized data (Log10)
		Expression		0h		6h		12h		24h		48h			PEN4	expression	log10
		n=3		Control	AgNPs	Control	AgNPs	Control	AgNPs	Control	AgNPs	control	AgNPs		T0 Control	1	0
				1	1	0.413679	0.456753	0.901098	0.771471	0.594371	0.0691625	0.30681	0.25506		T0 Control	1	0
				1	1	0.495437	0.258768	0.962542	1.31551	0.117748	0.18011	0.207584	0.197224		T0 Control	1	0
				1	1	0.419784	0.26981	0.442206	1.36855	0.373456	0.114194	0.23446	0.226747		T0 AgNPs	1	0
			Average	1	1	0.442967	0.328443	0.768615	1.15184	0.361858	0.121155	0.249618	0.226343		T0 AgNPs	1	0
			Stand desv	0	0	0.045543	0.111256	0.284343	0.330479	0.238523	0.0558002	0.0513202	0.0289201		T0 AgNPs	1	0
			Stand error	0	0	0.0262943	0.0642338	0.164166	0.190802	0.137711	0.0322163	0.0296297	0.016697		6h Control	0.413679	-0.383337
															6h Control	0.495437	-0.305012
															6h Control	0.419784	-0.376974
															6h AgNPs	0.456753	-0.340319
															6h AgNPs	0.258768	-0.58709
				0	6	12	24	48							6h AgNPs	0.26981	-0.568942
			Control	1	0.442967	0.768615	0.361858	0.249618	0	0.045543	0.284343	0.238523	0.0513202		12h Control	0.901098	-0.0452279
			Argovit-4	1	0.328443	1.15184	0.121155	0.226343	0	0.111256	0.330479	0.0558002	0.0289201		12h Control	0.962542	-0.0165802
															12h Control	0.442206	-0.354375
															12h AgNPs	0.771471	-0.11268
															12h AgNPs	1.31551	0.119095
															12h AgNPs	1.36855	0.136261
															24h Control	0.594371	-0.225943
															24h Control	0.117748	-0.929047
															24h Control	0.373456	-0.42776
															24h AgNPs	0.0691625	-1.16013
															24h AgNPs	0.18011	-0.744463
															24h AgNPs	0.114194	-0.942355
															48h Control	0.30681	-0.513131
															48h Control	0.207584	-0.682806
															48h Control	0.23446	-0.629931
															48h AgNPs	0.25506	-0.593358
															48h AgNPs	0.197224	-0.705041
															48h AgNPs	0.226747	-0.644459

## Sheet: proPO
Relative expression of the proPO gen from shrimp haemocytes treated with AgNPs
															Normalized data (Log10)
proPO		Ctrol 0h	AgNP 0h	Ctrol 6h	AgNP 6h	Ctrol 12h	AgNP 12h	Ctrol 24h	AgNPs 24h	Ctrol 48h	AgNPs 48h			proPO	expression	log10
expression		1	1	0.633919	0.475261	0.755479	0.650796	0.821411	0.77171	0.990064	0.583226			T0 Control	1	0
n=3		1	1	0.481769	0.484149	0.692076	0.841967	0.870512	0.370198	0.975046	0.430895			T0 Control	1	0
		1	1	0.707884	0.707122	0.670508	0.777118	0.702561	0.423633	0.696091	0.533603			T0 Control	1	0
	Average	1	1	0.607857	0.555511	0.706021	0.756627	0.798161	0.521847	0.887067	0.515908			T0 AgNPs	1	0
	Stand desv	0	0	0.115288	0.131374	0.044169	0.0972186	0.0863556	0.218031	0.165561	0.0776918			T0 AgNPs	1	0
	Stand error	0	0	0.0665616	0.0758488	0.025501	0.0561292	0.0498575	0.12588	0.0955865	0.0448554			T0 AgNPs	1	0
														6h Control	0.633919	-0.197966
														6h Control	0.481769	-0.317161
														6h Control	0.707884	-0.150038
		0	6	12	24	48								6h AgNPs	0.475261	-0.323067
	Control	1	0.607857	0.706021	0.798161	0.887067	0	0.115288	0.044169	0.0863556	0.165561			6h AgNPs	0.484149	-0.315021
	Argovit-4	1	0.555511	0.756627	0.521847	0.515908	0	0.131374	0.0972186	0.218031	0.0776918			6h AgNPs	0.707122	-0.150506
														12h Control	0.755479	-0.121777
														12h Control	0.692076	-0.159846
														12h Control	0.670508	-0.173596
														12h AgNPs	0.650796	-0.186555
														12h AgNPs	0.841967	-0.0747051
														12h AgNPs	0.777118	-0.109513
														24h Control	0.821411	-0.0854397
														24h Control	0.870512	-0.0602254
														24h Control	0.702561	-0.153316
														24h AgNPs	0.77171	-0.112546
														24h AgNPs	0.370198	-0.431566
														24h AgNPs	0.423633	-0.37301
														48h Control	0.696091	-0.157334
														48h Control	0.990064	-0.00433674
														48h Control	0.975046	-0.0109747
														48h AgNPs	0.583226	-0.234163
														48h AgNPs	0.430895	-0.365628
														48h AgNPs	0.533603	-0.272782
